# Supplementary material for: High-Density Horizontal Stacking of Chondrocytes via the Synergy of Biocompatible Magnetic Gelatin Nanocarriers and Internal Magnetic Navigation for Enhancing Cartilage Repair
Source: MDPI journal article supplement (doi:10.3390/polym14040809), 2022-02-19
Supplement: s1 [file s1]

## Supplementary Materials

### **High-density Horizontal Stacking of Chondrocytes via the Synergy of Biocompatible Magnetic Gelatin Nanocarriers and Internal Magnetic Navigation for Enhancing Cartilage Repair**

Shan-Wei Yang<sup>a1</sup>, Yong-Ji Chen<sup>b1</sup>, Huai-En Lu<sup>c</sup>, Ching-Jung Chen<sup>d</sup>, Chin-Yi Yang<sup>b</sup>,  
Jen-Hao Tsai<sup>b</sup>, Jen Tsai Liu<sup>c\*</sup>, San-Yuan Chen<sup>f,g,h\*</sup>, Shwu-Jen Chang<sup>b\*</sup>

<sup>a</sup> Department of Orthopedics, Kaohsiung Veterans General Hospital, Kaohsiung City, 813414, Taiwan

<sup>b</sup> Department of Biomedical Engineering, I-Shou University, Kaohsiung City, 82445, Taiwan

<sup>c</sup> School of Opto-Electronic Technology, University of Chinese Academy of Sciences, Beijing, 100049, PR China

<sup>d</sup> College of Materials Science and Opto-Electronic Technology, University of Chinese Academy of Sciences, Beijing, 100049, PR China

<sup>e</sup> Food Industry Research and Development Institute, Hsinchu, 300193, Taiwan

<sup>f</sup> Department of Materials Science and Engineering, National Yang-Ming Chiao Tung University, Hsinchu, 30010, Taiwan

<sup>g</sup> Graduate Institute of Biomedical Science, China Medical University, Taichung City, 406040, Taiwan

<sup>h</sup> School of Dentistry, College of Dental Medicine, Kaohsiung Medical University, Kaohsiung, 807, Taiwan

### **Corresponding author**

\*E-mail addresses: sjchang@isu.edu.tw (S.-J Chang)

\*E-mail addresses: sanyuanchen@nctu.edu.tw (S.-Y. Chen)

\*E-mail addresses: alfaroger@gmail.com (H.-E. Lu)

<sup>1</sup> These authors contribute equally to this work.

## Supplementary data

**Table S1.** Primers used in this study.

| Marker gene   | Sequences (5'-3') |                            | Accession No. |
|---------------|-------------------|----------------------------|---------------|
| <i>Gapdh</i>  | Forward           | AGGTCATCCACGACCACTTC       | NM_001082253  |
|               | Reverse           | GTGAGTTTCCCGTTCAGCTC       |               |
| <i>Col II</i> | Forward           | CAACAACCAGATCGAGAGCA       | NM_001195671  |
|               | Reverse           | GCTCCACCAGTTCTTCTTGG       |               |
| <i>Agg</i>    | Forward           | GACTCTTTCACATGCTTATGCCTTCC | XM_002723376  |
|               | Reverse           | GTGACGATGCTGCTCAGGTGTG     |               |
| <i>SOX9</i>   | Forward           | TTCATGAAGATGACCGACGA       | AY_598935     |
|               | Reverse           | GTCCAGTCGTAGCCCTTGAG       |               |
| <i>TIMP3</i>  | Forward           | CACCGTCAAGCAGATGAAGA       | NM_001195682  |
|               | Reverse           | CACAGCCCCGTGTATACCTT       |               |
| <i>Col I</i>  | Forward           | TAAGAGCTCCAAGGCCAAGA       | NM_001082253  |
|               | Reverse           | TGTTCTGAGAGGCGTGATTG       |               |
| <i>MMP13</i>  | Forward           | TCCCTGGGTCTGTTTCACTC       | NM_001082037  |
|               | Reverse           | TCTCCCCTCAGAGTGCTGAT       |               |

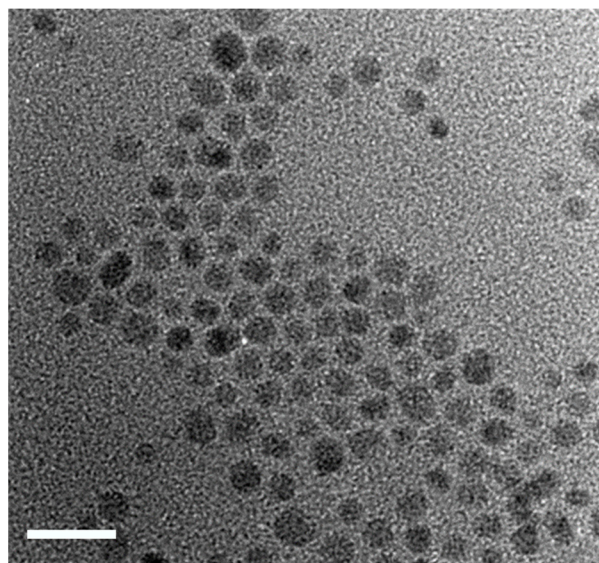

**Figure S1.** TEM image of SPIONs; scale bar = 20 nm.

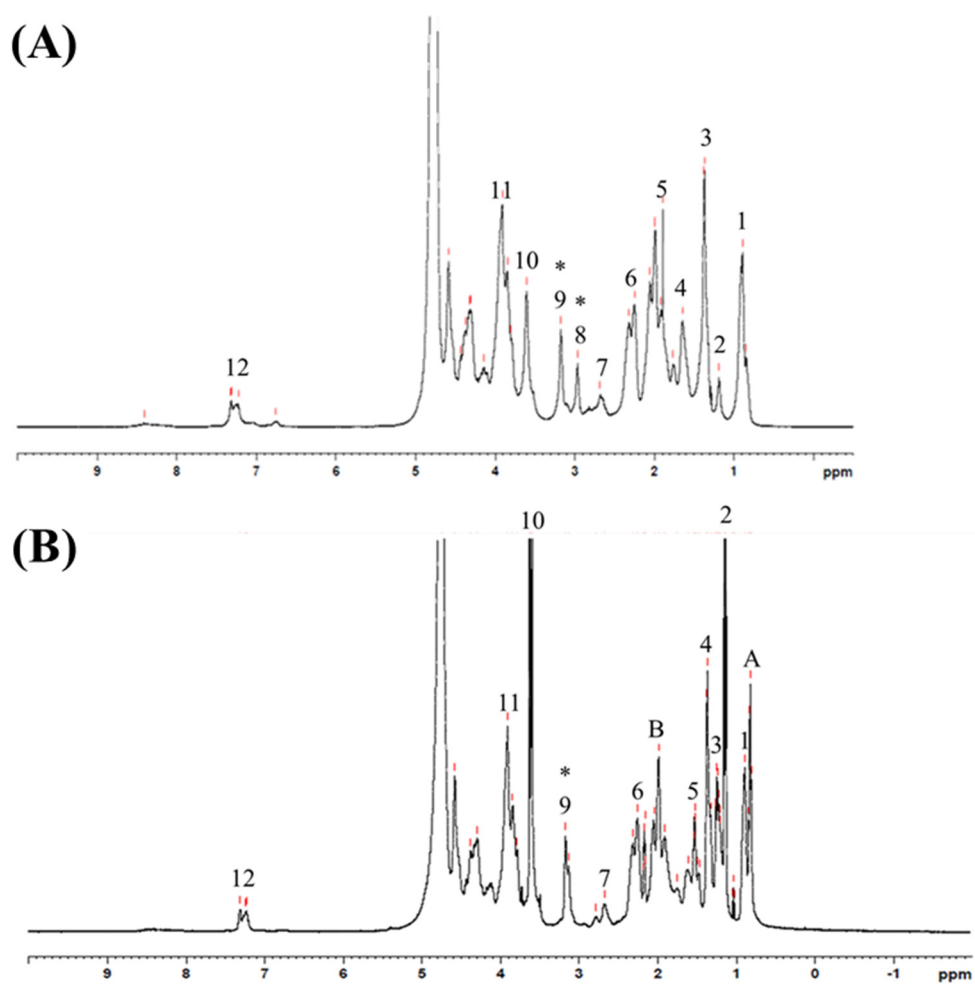

**Figure S2.**  $^1\text{H}$ -NMR spectrum of gelatin molecules in  $\text{D}_2\text{O}$ : (A) primitive and (B) modified gelatin molecules.

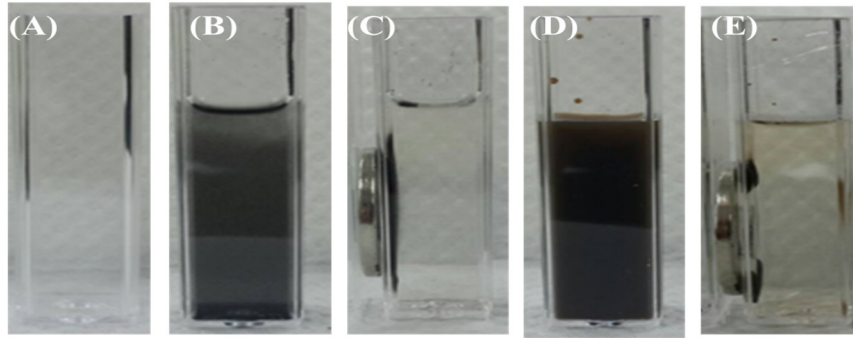

**Figure S3.** Evaluation of magnetic-guiding ability of the nanoparticles (A) blank, (B) SPIO, (C) MAGNC suspensions (20 µg/ml MAGNCs were homogeneously dispersed in d<sup>2</sup>H<sub>2</sub>O), (D) photo magnetic-guiding test of SPIO nanoparticles, (E) magnetic-guiding test of MAGNCs.

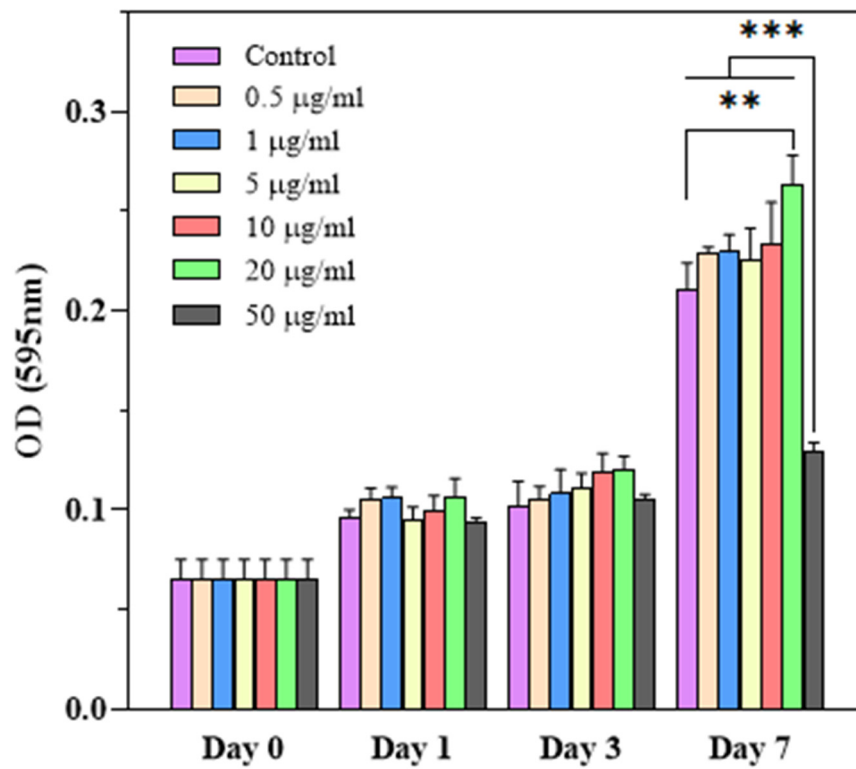

**Figure S4.** Cell proliferation assessment: chondrocytes were co-cultured with MAGNCs containing different concentrations of SPIONs for 1, 3, and 7 days. Data represent mean±SD, \*  $p < 0.05$  \*\*  $p < 0.01$ , \*\*\*  $p < 0.001$ .

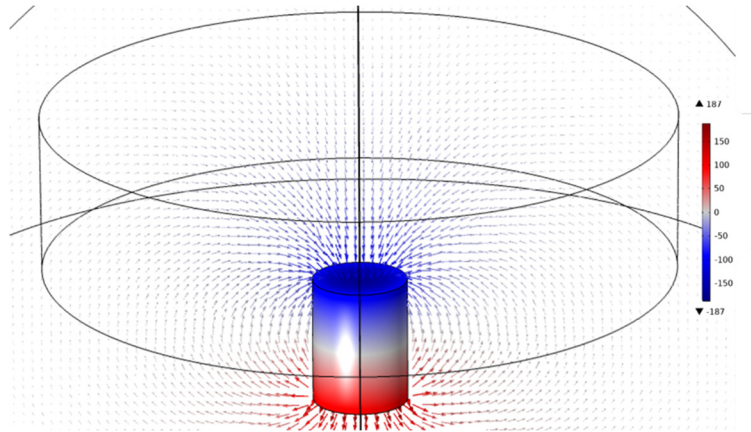

**Figure S5.** Simulation illustration of in vitro magnetic flux density distribution.

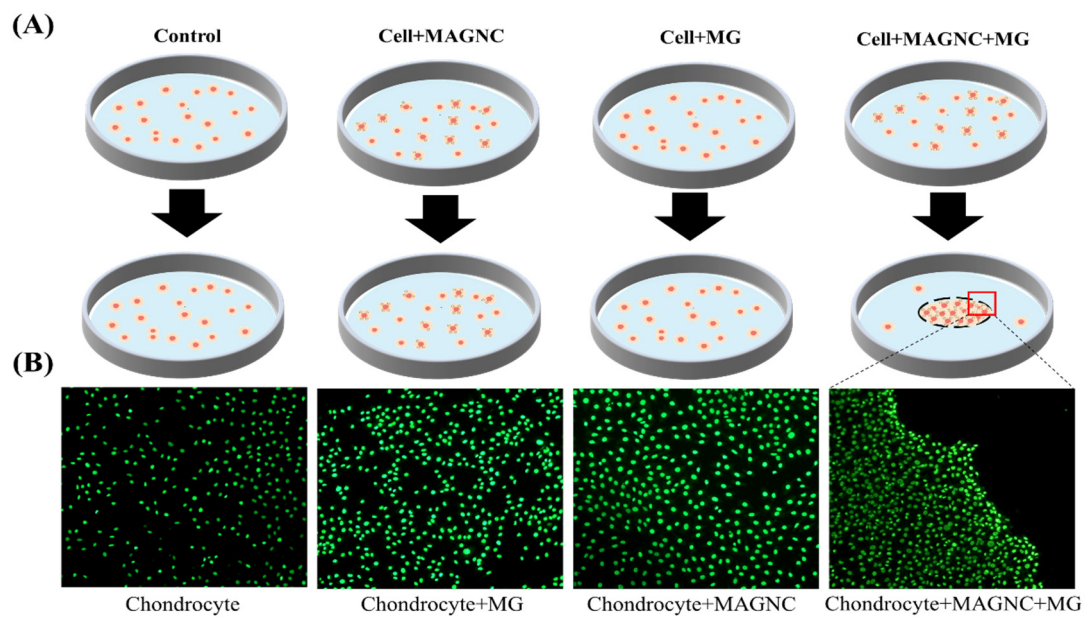

**Figure S6.** (A) Illustration of the in vitro magnetic guidance of MAGNC-labeled chondrocytes. (B) Florescence microscopy of the cells around magnetic enrichment with magnitudes of 10× (scale bar = 100  $\mu\text{m}$ )



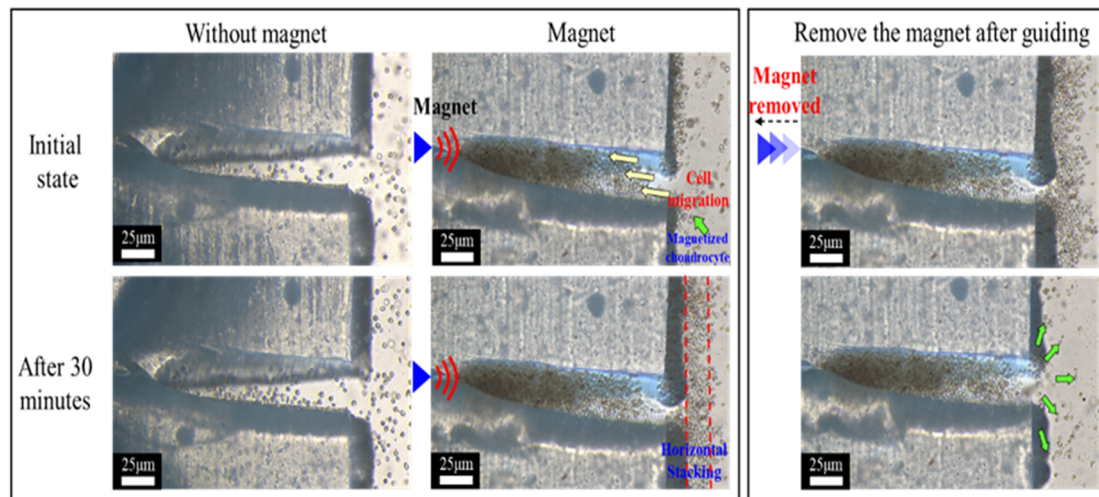

**Figure S7.** In vitro experiment to simulate cell migration by an external magnetic force to observe the dynamic movement of chondrocytes.

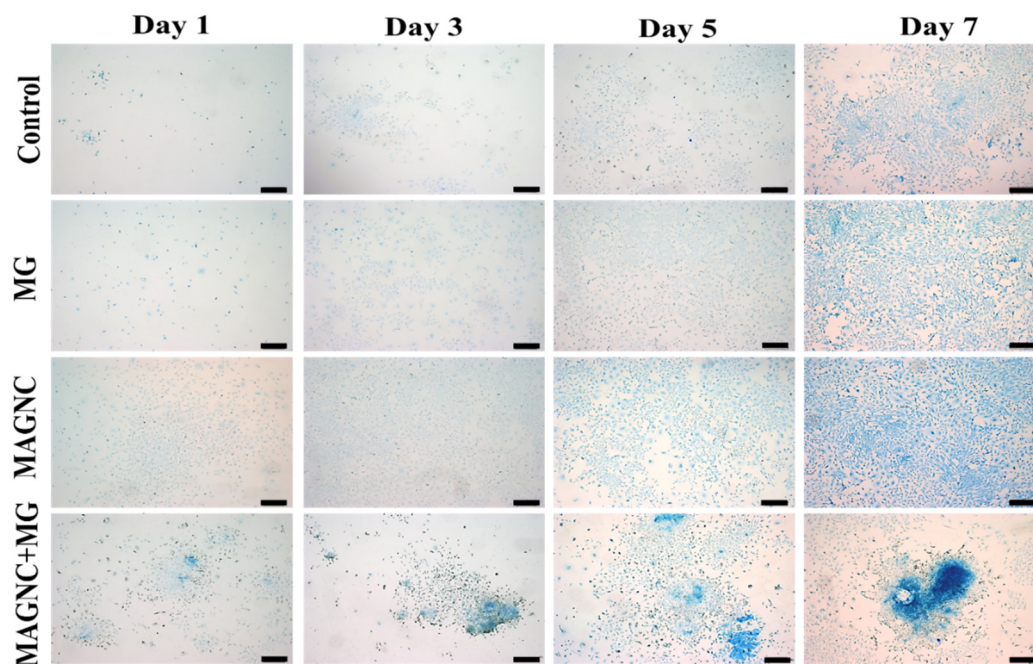

**Figure S8.** Alcian blue staining. GAGs secreted from chondrocytes were stained with Alcian blue to demonstrate the significant differences between GAGs and chondrocytes receiving various stimulations. (Scale bar: 200 µm)

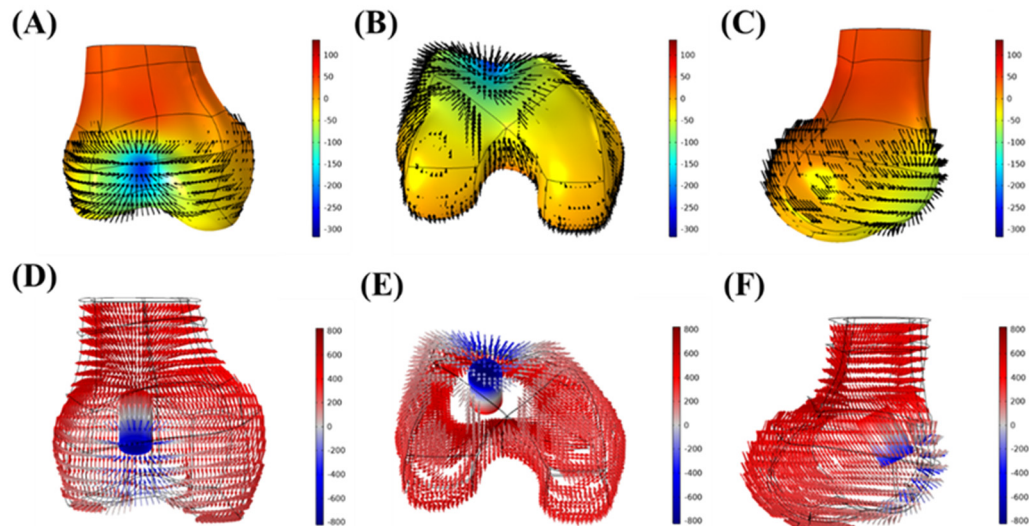

**Figure S9.** Simulation illustration of in vivo magnetic flux density distribution. Magnetic flux density distribution in (A) the x-y, (B) x-z, and (C) y-z planes along the cartilage surface. Magnetic flux density distribution in the (D) x-y (E) x-z and (F) y-z planes along magnet in the femur to simulate external magnetic field through cartilage surface.

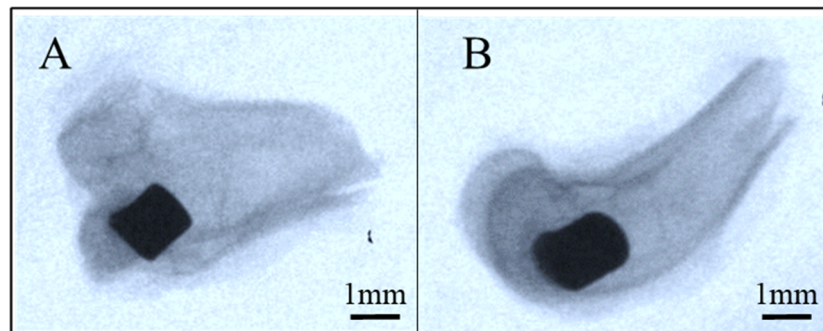

**Figure S10.** Location of the magnetic column. (A) X-ray images of implanted magnetic column; top view; (B) side view.

**Movie S1.** Observation of the guidance of SPIO magnetized chondrocytes via external magnet.

**Movie S2.** Observation of the guidance of MAGNC-magnetized chondrocytes via external magnet.
